# Supplementary material for: Injury risk in runners using standard or motion control shoes: a randomised controlled trial with participant and assessor blinding
Source: HighWire-hosted journal article supplement (doi:10.1136/bjsports-2015-095031), 2016-01-08
Supplement: bjsports-2015-095031supp.pdf [file bjsports-2015-095031supp.pdf]

Online supplementary table 1: Comparison of the participants included and excluded from the analysis.

| Characteristics             | Unit/ Qualifier         | Included<br>(n=372) | Excluded<br>(n=51) |
|-----------------------------|-------------------------|---------------------|--------------------|
| Age                         | Years                   | 40.4±10.5           | 38.7±10.4          |
| Sex                         | Male                    | 224 (60)            | 29 (57)            |
|                             | Female                  | 148 (40)            | 22 (43)            |
| BMI                         | kg.m <sup>-2</sup>      | 23.6±3.0            | 23.1±3.3           |
| Previous injury             | no                      | 280 (75)            | 33 (65)            |
|                             | yes                     | 92 (25)             | 18 (35)            |
| Running experience          | Years                   | 6 [0-45]            | 6 [0-36]           |
| Regularity (last 12 months) | Months                  | 12 [3-12]           | 12 [3-12]          |
| Foot morphology             | Supinated (and highly-) | 60 (16)             | 15 (29)            |
|                             | Neutral                 | 218 (58)            | 27 (53)            |
|                             | Pronated (and highly-)  | 94 (25)             | 9 (18)             |

Values are mean±SD or number (percentage); BMI: Body Mass Index.

Online supplementary table 2: Principal confounders in runners classified according to their foot category.

| Characteristics             | Unit/Qualifier     | Runners with<br>supinated feet<br>(n=60) | Runners with<br>neutral feet<br>(n=218) | Runners with<br>pronated feet<br>(n=94) | p-value |
|-----------------------------|--------------------|------------------------------------------|-----------------------------------------|-----------------------------------------|---------|
| Age                         | Years              | 39.2±11.0                                | 41.5±10.1                               | 38.8±10.7                               | 0.075   |
| Sex                         | Male               | 35 (58%)                                 | 132 (61%)                               | 57 (61%)                                | 0.948   |
|                             | Female             | 25 (42%)                                 | 86 (39%)                                | 37 (39%)                                |         |
| BMI                         | kg.m <sup>-2</sup> | 23.7±3.1                                 | 23.6±3.0                                | 23.6±3.2                                | 0.991   |
| Previous Injury             | no                 | 48 (80%)                                 | 157 (72%)                               | 75 (80%)                                | 0.224   |
|                             | yes                | 12 (20%)                                 | 61 (28%)                                | 19 (20%)                                |         |
| Running experience          | Years              | 4 [0-45]                                 | 7 [0-40]                                | 5 [0-40]                                | 0.178   |
| Regularity (last 12 months) | Months             | 12 [6-12]                                | 12 [5-12]                               | 12 [3-12]                               | 0.088   |

Values are mean±SD or number (percentage); BMI: Body Mass Index.
